# Supplementary material for: Variation of the Number of Heat Sources in Methane Dry Reforming: A Computational Fluid Dynamics Study
Source: Hindawi journal article supplement (doi:10.1155/2021/4737513), 2021-11-24
Supplement: f1 [file 4737513.f1.docx]

|  | reactor length | 0.2m | T_ht 1000K | T_ref 800K |  |  |  |
| --- | --- | --- | --- | --- | --- | --- | --- |
|  |  |  |  |  |  |  |  |
|  | 2 heating tubes | ht radius 0.01483m | reactor rad 0.05241883m | outer rad 0.05741883m |  |  |  |
|  |  |  |  |  |  |  |  |
|  | position from center m | ch4 in mol/s | ch4 out | conversion | T_ht in average K | T_ht out | h2 out mol/s |
|  | 0.018 | 3.63E-04 | 1.99E-04 | 4.50E-01 | 1000 | 999.92 | 3.31E-04 |
|  | 0.02 | 3.59E-04 | 1.92E-04 | 4.66E-01 | 1000 | 999.92 | 3.36E-04 |
|  | 0.022 | 3.56E-04 | 1.86E-04 | 4.78E-01 | 1000 | 999.92 | 3.40E-04 |
|  | 0.024 | 3.55E-04 | 1.83E-04 | 4.84E-01 | 1000 | 999.92 | 3.43E-04 |
|  | 0.026 | 3.55E-04 | 1.82E-04 | 4.87E-01 | 1000 | 999.92 | 3.45E-04 |
|  | 0.028 | 3.56E-04 | 1.83E-04 | 4.85E-01 | 1000 | 999.92 | 3.44E-04 |
|  | 0.03 | 3.57E-04 | 1.87E-04 | 4.77E-01 | 1000 | 999.92 | 3.42E-04 |
|  | 0.032 | 3.60E-04 | 1.91E-04 | 4.68E-01 | 1000 | 999.93 | 0.00033957 |
|  |  |  |  |  |  |  |  |
|  |  |  |  |  |  |  |  |
|  |  |  |  |  |  |  |  |
|  |  |  |  |  |  |  |  |
|  |  |  |  |  |  |  |  |
|  |  |  |  |  |  |  |  |
|  | 3 heating tubes |  |  |  |  |  |  |
|  | angle between tubes 30 | ht rad 0.01211m |  |  |  |  |  |
|  |  |  |  |  |  |  |  |
|  | position from center m | ch4 in mol/s | ch4 out | conversion | T_ht in average K | T_ht out | h2 out |
|  | 0.018 | 3.55E-04 | 1.82E-04 | 4.88E-01 | 1000 | 999.92 | 3.43E-04 |
|  | 0.02 | 3.48E-04 | 1.67E-04 | 5.19E-01 | 1000 | 999.91 | 3.53E-04 |
|  | 0.022 | 3.42E-04 | 1.55E-04 | 5.48E-01 | 1000 | 999.91 | 3.62E-04 |
|  | 0.024 | 3.38E-04 | 1.46E-04 | 5.68E-01 | 1000 | 999.91 | 3.69E-04 |
|  | 0.026 | 3.35E-04 | 1.40E-04 | 5.83E-01 | 1000 | 999.91 | 3.75E-04 |
|  | 0.028 | 3.34E-04 | 1.36E-04 | 5.92E-01 | 1000 | 999.91 | 3.78E-04 |
|  | 0.03 | 3.32E-04 | 1.32E-04 | 6.01E-01 | 1000 | 999.91 | 3.81E-04 |
|  | 0.032 | 3.32E-04 | 1.33E-04 | 6.01E-01 | 1000 | 999.91 | 3.82E-04 |
|  |  |  |  |  |  |  |  |
|  |  |  |  |  |  |  |  |
|  |  |  |  |  |  |  |  |
|  | 4 heating tubes |  |  |  |  |  |  |
|  | angle between tubes 90 | ht rad 0.010488m |  |  |  |  |  |
|  |  |  |  |  |  |  |  |
|  | position from center m | ch4 in mol/s | ch4 out | conversion | T_ht in average K | T_ht out |  |
|  |  |  |  |  |  |  |  |
|  | 0.02 | 3.45E-04 | 1.61E-04 | 5.32E-01 | 1.00E+03 | 999.91 | 3.55E-04 |
|  | 0.022 | 3.37E-04 | 1.46E-04 | 5.66E-01 | 1.00E+03 | 999.91 | 3.65E-04 |
|  | 0.024 | 3.31E-04 | 1.34E-04 | 5.96E-01 | 1.00E+03 | 999.91 | 3.74E-04 |
|  | 0.026 | 3.26E-04 | 1.24E-04 | 6.21E-01 | 1.00E+03 | 999.91 | 3.81E-04 |
|  | 0.028 | 3.23E-04 | 1.17E-04 | 6.38E-01 | 1.00E+03 | 999.9 | 3.86E-04 |
|  | 0.03 | 3.20E-04 | 1.11E-04 | 6.52E-01 | 1.00E+03 | 999.9 | 3.90E-04 |
|  | 0.032 | 3.18E-04 | 1.08E-04 | 6.62E-01 | 1.00E+03 | 999.9 | 3.94E-04 |
|  | 0.034 | 3.19E-04 | 1.07E-04 | 6.65E-01 | 1.00E+03 | 999.9 | 3.96E-04 |
|  |  |  |  |  |  |  |  |
|  |  |  |  |  |  |  |  |
|  |  |  |  |  |  |  |  |
|  | 4 heating tubes | 1 center and 3 | ht rad |  |  |  |  |
|  | angle between tubes 120 | |  |  |  |  |  |
|  |  |  |  |  |  |  |  |
|  | position from center m | ch4 in mol/s | ch4 out | conversion | T_ht in average K | T_ht out | h out mol/s |
|  |  |  |  |  |  |  |  |
|  | 0.026 | 3.41E-04 | 1.52E-04 | 5.53E-01 | 1.00E+03 | 999.9 | 3.64E-04 |
|  | 0.028 | 3.36E-04 | 1.42E-04 | 5.76E-01 | 1.00E+03 | 999.91 | 3.70E-04 |
|  | 0.03 | 3.33E-04 | 1.35E-04 | 5.94E-01 | 1.00E+03 | 999.91 | 3.76E-04 |
|  | 0.032 | 3.29E-04 | 1.28E-04 | 6.10E-01 | 1.00E+03 | 999.91 | 3.79E-04 |
|  | 0.034 | 3.27E-04 | 1.25E-04 | 6.19E-01 | 1.00E+03 | 999.91 | 3.82E-04 |
|  |  |  |  |  |  |  |  |
|  |  |  |  |  |  |  |  |
|  |  |  |  |  |  |  |  |
|  | 4 heating tubes | fixed two position from center | |  |  |  |  |
|  |  | 0.034m |  |  |  |  |  |
|  |  |  |  |  |  |  |  |
|  | position from center m | ch4 in mol/s | ch4 out | conversion | T_ht in average K | T_ht out | h2 out mol/s |
|  |  |  |  |  |  |  |  |
|  | 0.018 | 3.29E-04 | 1.29E-04 | 6.07E-01 | 1.00E+03 | 999.91 | 3.77E-04 |
|  | 0.02 | 3.27E-04 | 1.25E-04 | 6.18E-01 | 1.00E+03 | 999.91 | 3.81E-04 |
|  | 0.022 | 3.25E-04 | 1.21E-04 | 6.29E-01 | 1.00E+03 | 999.91 | 3.84E-04 |
|  | 0.024 | 3.22E-04 | 1.17E-04 | 6.38E-01 | 1.00E+03 | 999.9 | 3.87E-04 |
|  | 0.026 | 3.21E-04 | 1.13E-04 | 6.47E-01 | 1.00E+03 | 999.9 | 3.89E-04 |
|  |  |  |  |  |  |  |  |
|  |  |  |  |  |  |  |  |
|  |  |  |  |  |  |  |  |
|  |  |  |  |  |  |  |  |
|  |  |  |  |  |  |  |  |
|  |  |  |  |  |  |  |  |
|  | 5 heating tubes | ht rad 0.00938m |  |  |  |  |  |
|  |  |  |  |  |  |  |  |
|  | position from center m | ch4 in mol/s | ch4 out | conversion | T_ht in average K | T_ht out | h2 out mol/s |
|  |  |  |  |  |  |  |  |
|  | 0.022 | 3.36E-04 | 1.44E-04 | 5.72E-01 | 1.00E+03 | 999.91 | 3.65E-04 |
|  | 0.024 | 3.28E-04 | 1.29E-04 | 6.06E-01 | 1.00E+03 | 999.91 | 3.74E-04 |
|  | 0.026 | 3.22E-04 | 1.18E-04 | 6.35E-01 | 1.00E+03 | 999.9 | 3.81E-04 |
|  | 0.028 | 3.17E-04 | 1.08E-04 | 6.58E-01 | 1.00E+03 | 999.9 | 3.86E-04 |
|  | 0.03 | 3.14E-04 | 1.02E-04 | 6.75E-01 | 1.00E+03 | 999.9 | 3.91E-04 |
|  | 0.032 | 3.12E-04 | 9.72E-05 | 6.88E-01 | 1.00E+03 | 999.9 | 3.95E-04 |
|  | 0.034 | 3.10E-04 | 9.38E-05 | 6.97E-01 | 1.00E+03 | 999.9 | 3.98E-04 |
|  |  |  |  |  |  |  |  |
|  |  |  |  |  |  |  |  |
|  |  |  |  |  |  |  |  |
|  | 5 heating tubes | 1 center 4 out |  |  |  |  |  |
|  | angle 90 |  |  |  |  |  |  |
|  |  |  |  |  |  |  |  |
|  | position from center m | ch4 in mol/s | ch4 out | conversion | T_ht in average K | T_ht out | h2 out mol/s |
|  |  |  |  |  |  |  |  |
|  |  |  |  |  |  |  |  |
|  | 0.026 | 3.34E-04 | 1.38E-04 | 5.88E-01 | 1000 | 966.91 | 3.76E-04 |
|  | 0.028 | 3.30E-04 | 1.30E-04 | 6.07E-01 | 1000 | 964.5 | 3.82E-04 |
|  | 0.03 | 3.28E-04 | 1.24E-04 | 6.22E-01 | 1000 | 962.78 | 3.87E-04 |
|  | 0.032 | 3.25E-04 | 1.19E-04 | 6.34E-01 | 1000 | 961.44 | 3.91E-04 |
|  |  |  |  |  |  |  |  |
|  |  |  |  |  |  |  |  |
|  |  |  |  |  |  |  |  |
|  |  |  |  |  |  |  |  |
|  | 6 heating tubes | ht rad 0.008563m |  |  |  |  |  |
|  |  |  |  |  |  |  |  |
|  |  |  |  |  |  |  |  |
|  | position from center m | ch4 in mol/s | ch4 out | conversion | T_ht in average K | T_ht out | h2 out mol/s |
|  |  |  |  |  |  |  |  |
|  | 0.024 | 3.27E-04 | 1.28E-04 | 6.09E-01 | 1.00E+03 | 999.9 | 3.73E-04 |
|  | 0.026 | 3.20E-04 | 1.15E-04 | 6.40E-01 | 1.00E+03 | 999.9 | 3.80E-04 |
|  | 0.028 | 3.14E-04 | 1.05E-04 | 6.67E-01 | 1.00E+03 | 999.96 | 3.85E-04 |
|  | 0.03 | 3.10E-04 | 9.72E-05 | 6.86E-01 | 1.00E+03 | 999.9 | 3.90E-04 |
|  | 0.032 | 3.07E-04 | 9.18E-05 | 7.01E-01 | 1.00E+03 | 999.9 | 3.93E-04 |
|  | 0.034 | 3.05E-04 | 8.71E-05 | 7.14E-01 | 1.00E+03 | 999.9 | 3.96E-04 |
|  |  |  |  |  |  |  |  |
|  |  |  |  |  |  |  |  |
|  |  |  |  |  |  |  |  |
|  | 6 heating tubes | ht rad 0.008563m |  |  |  |  |  |
|  | 1 center 5 out |  |  |  |  |  |  |
|  |  |  |  |  |  |  |  |
|  | position from center m | ch4 in mol/s | ch4 out | conversion | T_ht in average K | T_ht out | h2 out mol/s |
|  |  |  |  |  |  |  |  |
|  | 0.024 | 3.32E-04 | 1.37E-04 | 5.87E-01 | 1.00E+03 | 999.91 | 3.69E-04 |
|  | 0.026 | 3.25E-04 | 1.24E-04 | 6.18E-01 | 1.00E+03 | 999.9 | 3.76E-04 |
|  | 0.028 | 3.19E-04 | 1.14E-04 | 6.44E-01 | 1.00E+03 | 999.9 | 3.81E-04 |
|  | 0.03 | 3.15E-04 | 1.05E-04 | 6.66E-01 | 1.00E+03 | 999.9 | 3.85E-04 |
|  | 0.032 | 3.11E-04 | 9.84E-05 | 6.83E-01 | 1.00E+03 | 999.9 | 3.89E-04 |
|  | 0.034 | 3.08E-04 | 9.29E-05 | 6.98E-01 | 1.00E+03 | 999.9 | 3.92E-04 |
|  |  |  |  |  |  |  |  |
|  |  |  |  |  |  |  |  |
|  |  |  |  |  |  |  |  |
|  | 6 heating tubes | ht rad 0.008563m |  |  |  |  |  |
|  | 3 tubes fixed position | 0.034m |  |  |  |  |  |
|  |  |  |  |  |  |  |  |
|  | position from center m | ch4 in mol/s | ch4 out | conversion | T_ht in average K | T_ht out | h2 out mol/s |
|  |  |  |  |  |  |  |  |
|  | 0.018 | 3.18E-04 | 1.11E-04 | 6.51E-01 | 1.00E+03 | 999.9 | 3.82E-04 |
|  | 0.02 | 3.16E-04 | 1.07E-04 | 6.60E-01 | 1.00E+03 | 999.9 | 3.84E-04 |
|  | 0.022 | 3.14E-04 | 1.04E-04 | 6.70E-01 | 1.00E+03 | 999.9 | 3.86E-04 |
|  | 0.024 | 3.12E-04 | 1.00E-04 | 6.79E-01 | 1.00E+03 | 999.9 | 3.88E-04 |
|  | 0.026 | 3.10E-04 | 9.69E-05 | 6.87E-01 | 1.00E+03 | 999.9 | 3.90E-04 |
|  |  |  |  |  |  |  |  |
|  |  |  |  |  |  |  |  |
|  |  |  |  |  |  |  |  |
|  |  |  |  |  |  |  |  |
|  | 7 heating tubes | ht rad 0.007928m | 1 center 6 out |  |  |  |  |
|  |  |  |  |  |  |  |  |
|  | position from center m | ch4 in mol/s | ch4 out | conversion | T_ht in average K | T_ht out | h2 out mol/s |
|  |  |  |  |  |  |  |  |
|  | 0.024 | 3.29E-04 | 1.32E-04 | 5.99E-01 | 1.00E+03 | 999.91 | 3.70E-04 |
|  | 0.026 | 3.22E-04 | 1.19E-04 | 6.31E-01 | 1.00E+03 | 999.9 | 3.76E-04 |
|  | 0.028 | 3.15E-04 | 1.08E-04 | 6.58E-01 | 1.00E+03 | 999.9 | 3.81E-04 |
|  | 0.03 | 3.10E-04 | 9.91E-05 | 6.81E-01 | 1.00E+03 | 999.9 | 3.85E-04 |
|  | 0.032 | 3.06E-04 | 9.21E-05 | 6.99E-01 | 1.00E+04 | 999.9 | 3.88E-04 |
|  | 0.034 | 3.03E-04 | 8.64E-05 | 7.15E-01 | 1.00E+03 | 999.9 | 3.91E-04 |
|  |  |  |  |  |  |  |  |
|  |  |  |  |  |  |  |  |
|  |  |  |  |  |  |  |  |
|  | 7 heating tubes | 1(center) and 3 fixed 0.034m |  |  |  |  |  |
|  |  |  |  |  |  |  |  |
|  | position from center m | ch4 in mol/s | ch4 out | conversion | T_ht in average K | T_ht out | h2 out mol/s |
|  |  |  |  |  |  |  |  |
|  | 0.02 | 3.27E-04 | 1.27E-04 | 6.12E-01 | 1.00E+03 | 999.91 | 3.77E-04 |
|  | 0.022 | 3.25E-04 | 1.23E-04 | 6.22E-01 | 1.00E+03 | 999.91 | 3.78E-04 |
|  | 0.024 | 3.23E-04 | 1.20E-04 | 6.29E-01 | 1.00E+03 | 999.54 | 3.79E-04 |
|  | 0.026 | 3.21E-04 | 1.16E-04 | 6.38E-01 | 1.00E+03 | 999.9 | 3.81E-04 |
|  | 0.028 | 3.19E-04 | 1.13E-04 | 6.45E-01 | 1.00E+03 | 999.9 | 3.82E-04 |
|  | 0.03 | 3.18E-04 | 1.11E-04 | 6.52E-01 | 1.00E+03 | 999.91 | 3.84E-04 |
|  |  |  |  |  |  |  |  |
|  |  |  |  |  |  |  |  |
|  |  |  |  |  |  |  |  |
|  |  |  |  |  |  |  |  |
|  | 8 heating tubes | ht rad |  |  |  |  |  |
|  |  |  |  |  |  |  |  |
|  | position from center m | ch4 in mol/s | ch4 out | conversion | T_ht in average K | T_ht out | h2 out mol/s |
|  |  |  |  |  |  |  |  |
|  | 0.026 | 3.19E-04 | 1.15E-04 | 6.41E-01 | 1.00E+03 | 999.9 | 3.79E-04 |
|  | 0.028 | 3.13E-04 | 1.03E-04 | 6.70E-01 | 1.00E+03 | 999.9 | 3.83E-04 |
|  | 0.03 | 3.07E-04 | 9.39E-05 | 6.94E-01 | 1.00E+03 | 999.9 | 3.87E-04 |
|  | 0.032 | 3.04E-04 | 8.75E-05 | 7.12E-01 | 1.00E+03 | 999.95 | 3.90E-04 |
|  | 0.034 | 3.01E-04 | 8.28E-05 | 7.25E-01 | 1.00E+03 | 999.9 | 3.92E-04 |
